# Supplementary material
Source: PubMed Central journal article supplement (PMC3187699)
Supplement: NIHMS323193-supplement-supplement_1.pdf [file NIHMS323193-supplement-supplement_1.pdf]

**Supplementary Table 1** - Socio-demographic and other characteristics according to participants' pediatric migraine status, Seattle and Tacoma, Washington, USA 1996-2008

| Characteristics                     | Pediatric Migraine | <sup>1</sup> No Migraine | P-value |
|-------------------------------------|--------------------|--------------------------|---------|
|                                     | N=220              | N=3063                   |         |
|                                     | %                  | %                        |         |
| Age (years)*                        | 31.2 ± 4.9         | 32.7 ± 4.5               | <0.001  |
| <30                                 | 35.5               | 22.0                     | <0.001  |
| 30-34                               | 40.0               | 44.3                     |         |
| 35-39                               | 20.9               | 27.2                     |         |
| ≥40                                 | 3.6                | 6.5                      |         |
| Race/ethnicity                      |                    |                          |         |
| Non-Hispanic White                  | 92.3               | 85.9                     | 0.008   |
| Other                               | 7.7                | 14.1                     |         |
| Annual Household Income (\$)        |                    |                          |         |
| <30,000                             | 5.0                | 3.5                      | 0.38    |
| 30,000-69,999                       | 22.3               | 19.6                     |         |
| ≥ 70,000                            | 68.6               | 73.6                     |         |
| Missing                             | 4.1                | 3.3                      |         |
| Nulliparous                         | 64.1               | 63.4                     | 0.83    |
| Education ≤ high school             | 5.0                | 3.9                      | 0.43    |
| Unmarried                           | 13.6               | 8.7                      | 0.01    |
| History of Diabetes Mellitus        | 2.3                | 1.3                      | 0.21    |
| History of Chronic Hypertension     | 8.6                | 4.0                      | <0.001  |
| Family History of Diabetes Mellitus | 16.8               | 14.4                     | 0.33    |
| Family History of Hypertension      | 50.9               | 49.4                     | 0.66    |
| Currently Employed                  | 81.8               | 81.3                     | 0.84    |
| Current Smoker                      | 31.8               | 27.5                     | 0.17    |
| Multivitamin User                   | 97.3               | 97.4                     | 0.94    |
| No Current Exercise                 | 10.0               | 8.0                      | 0.29    |
| Exercise as teenager (13-17 years)  |                    |                          |         |
| Yes                                 | 94.1               | 93.8                     | 0.71    |
| No                                  | 4.1                | 4.8                      |         |
| missing                             | 1.8                | 1.4                      |         |

\*Mean ± standard deviation (SD)

<sup>1</sup>**NOTE:** For this analysis, we excluded women with migraine a diagnosed as an adult (diagnosed ≥18 years of age; N=445) and those women with missing information for age at migraine diagnosis (N=5)

**Supplementary Table 2** - Comparison of participants' anthropometric characteristics according to pediatric migraine diagnosis, Seattle and Tacoma, Washington, USA 1996-2008

| <b>Characteristics</b>                         | <b>Pediatric Migraine<br/>N=220<br/>Mean ± SD</b> | <b><sup>1</sup>No Migraine<br/>N=3063<br/>Mean ± SD</b> | <b>Student's<br/>T-Test<br/>P-value</b> |
|------------------------------------------------|---------------------------------------------------|---------------------------------------------------------|-----------------------------------------|
| Weight at age 18 (kg)                          | 58.8 ± 12.2                                       | 57.4 ± 8.8                                              | 0.099                                   |
| Adult Height (m)                               | 1.67 ± 0.07                                       | 1.67 ± 0.07                                             | 0.371                                   |
| Body Mass Index at age 18 (kg/m <sup>2</sup> ) | 21.1 ± 3.9                                        | 20.7 ± 2.9                                              | 0.137                                   |
| Pregravid Weight (kg)                          | 69.9 ± 21.2                                       | 65.1 ± 13.6                                             | 0.001                                   |
| Pregravid Body Mass Index (kg/m <sup>2</sup> ) | 25.0 ± 7.1                                        | 23.4 ± 4.7                                              | 0.001                                   |
| Adult Weight Gain (kg)                         | 11.1 ± 14.3                                       | 7.6 ± 10.4                                              | 0.001                                   |

Mean ± standard deviation (SD).

<sup>1</sup>**NOTE:** For this analysis, we excluded women with migraine a diagnosed as an adult (diagnosed ≥18 years of age; N=445) and those women with missing information for age at migraine diagnosis (N=5)
